# Supplementary material for: Antagonistic Effect of a Cytoplasmic Domain on the Basal Activity of Polymodal Potassium Channels
Source: Front Mol Neurosci. 2018 Sep 4;11:301. doi: 10.3389/fnmol.2018.00301 (PMC6131555; doi:10.3389/fnmol.2018.00301)
Supplement: Supplementary file 1 [file Image_1.pdf]

## Supplementary Information

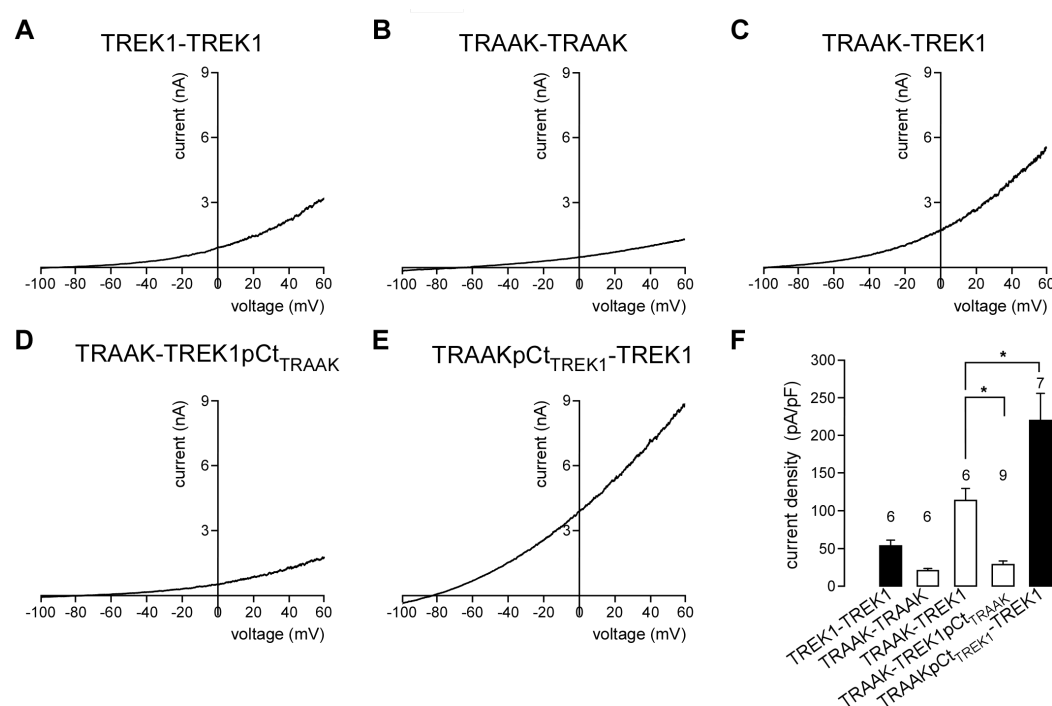

**FIGURE S1. pCt regulates current amplitude of the TRAAK-TREK1 heterodimer.** A-E, Representative whole-cell recordings from HEK cells expressing covalent tandems TREK1-TREK1 (A), TRAAK-TRAAK (B), TRAAK-TREK1 (C), TRAAK-TREK1pCt<sub>TRAAK</sub> (D) and TRAAKpCt<sub>TREK1</sub>-TREK1 (E). F, Current densities at 0 mV for the indicated channels. Data are presented as mean  $\pm$  SEM, \*p<0.05, the number of cells is indicated (one-way Anova with Tukey's test).

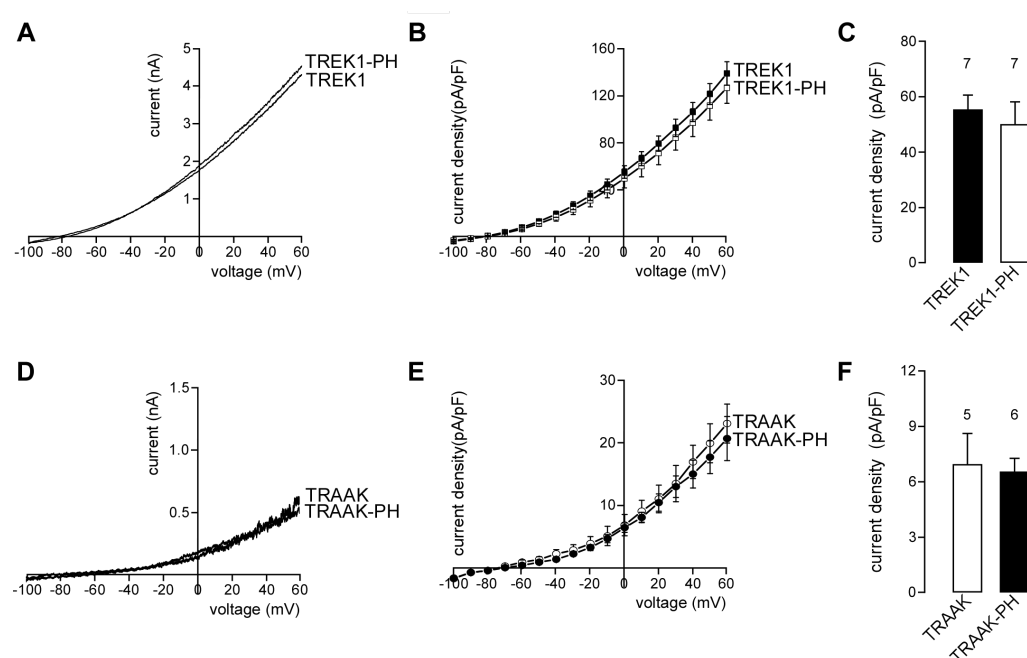

**FIGURE S2. Fusion of pHluorin to TREK1 and TRAAK does not affect channel activity.** A, D, Representative whole-cell recordings of HEK cells expressing TREK1 or TREK1-PH (A) and TRAAK or TRAAK-PH (D). B, E, Current density/voltage curves obtained from currents shown in A and D. C, F, Current densities at 0 mV, Data are presented as mean  $\pm$  SEM. The number of cells is indicated (Student's t-test).

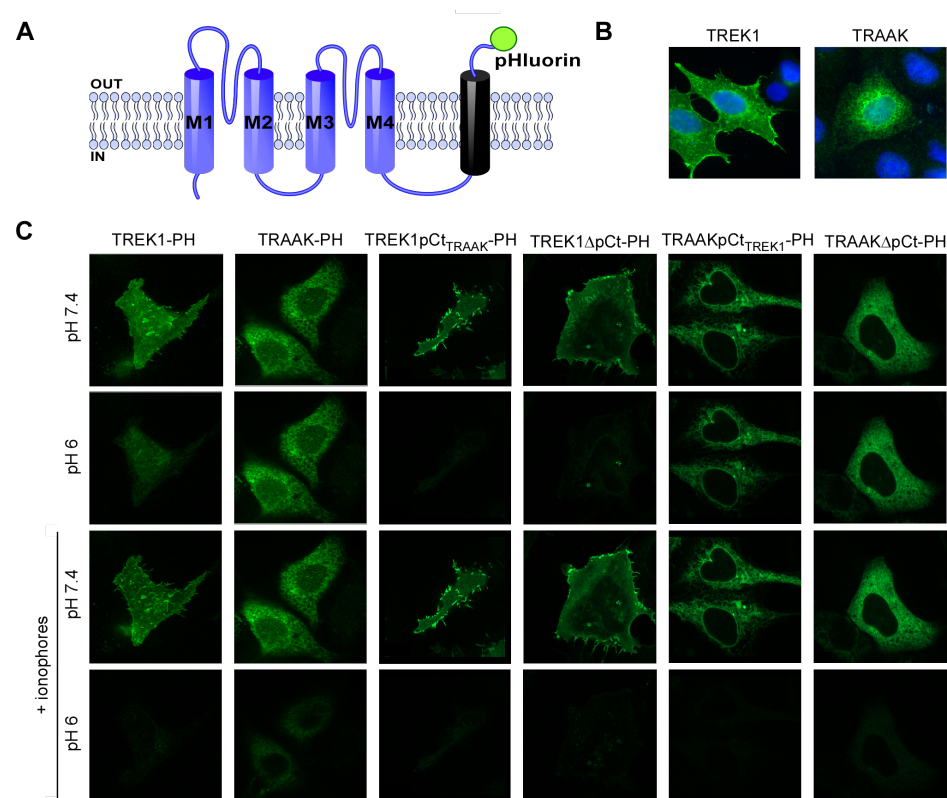

**FIGURE S3. Deletion or swapping of pCt does not affect channel cellular trafficking.** A, Schematic representation of pHluorin-tagged channels. An additional membrane-spanning segment was added between the channel and pHluorin, to expose pHluorin to the extracellular medium. B, Immunolabeling of wild-type channels expressed in HEK cells. Channels are in green. C, Representative images of pHluorin-tagged channels in live HEK cells. Acidification of the extracellular medium induces a quenching of pHluorin exposed at the plasma membrane without affecting fluorescence in internal cell compartments. Application of ionophores leads to the dissipation of the pH gradients, leading to a maximal signal at pH 7.4 and to a total fluorescence quenching at pH 6.

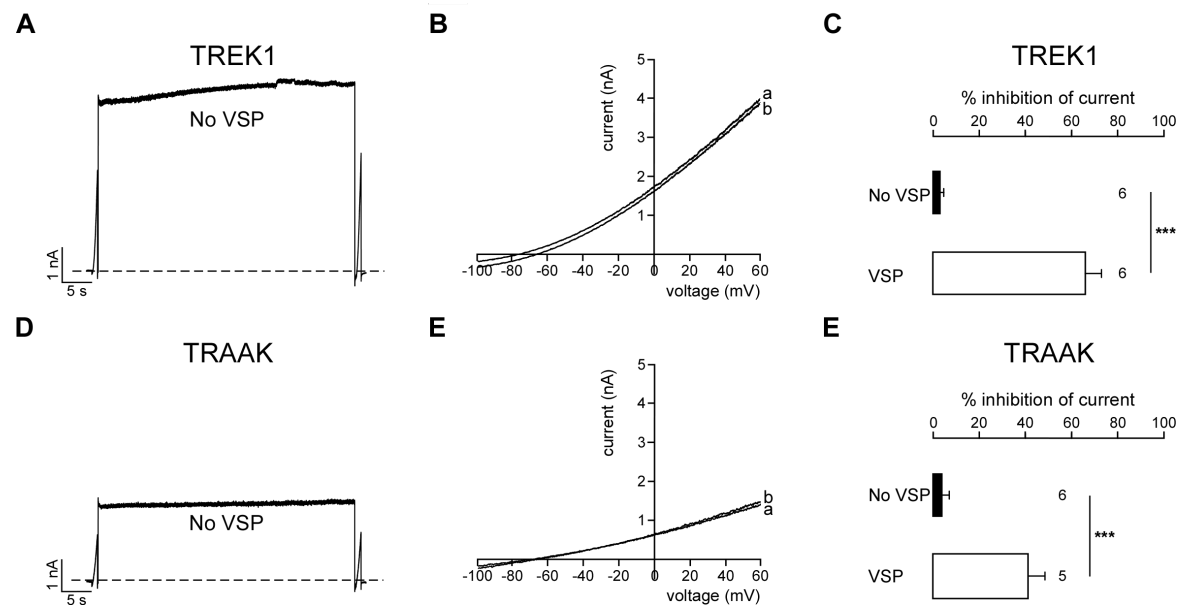

FIGURE S4. **TREK1 and TRAAK currents are not affected by strong depolarizations in the absence of VSP co-expression.** **A, D**, Representative perforated patch-clamp recordings from HEK cells expressing TREK1 (**A**) and TRAAK (**D**). Same protocol as in Fig. 6A and Fig. 7A. **B, E**, TREK1 (**B**) and TRAAK (**E**) currents before (a) and after (b) the +120 mV/40 s depolarizing pulse. **C, F**, Current inhibition (%) at 0 mV in cells expressing VSP *versus* cells not expressing VSP. Data are presented as mean  $\pm$  SEM, \*\*\* $p$ <0.001, the number of cells is indicated (Student's t-test).

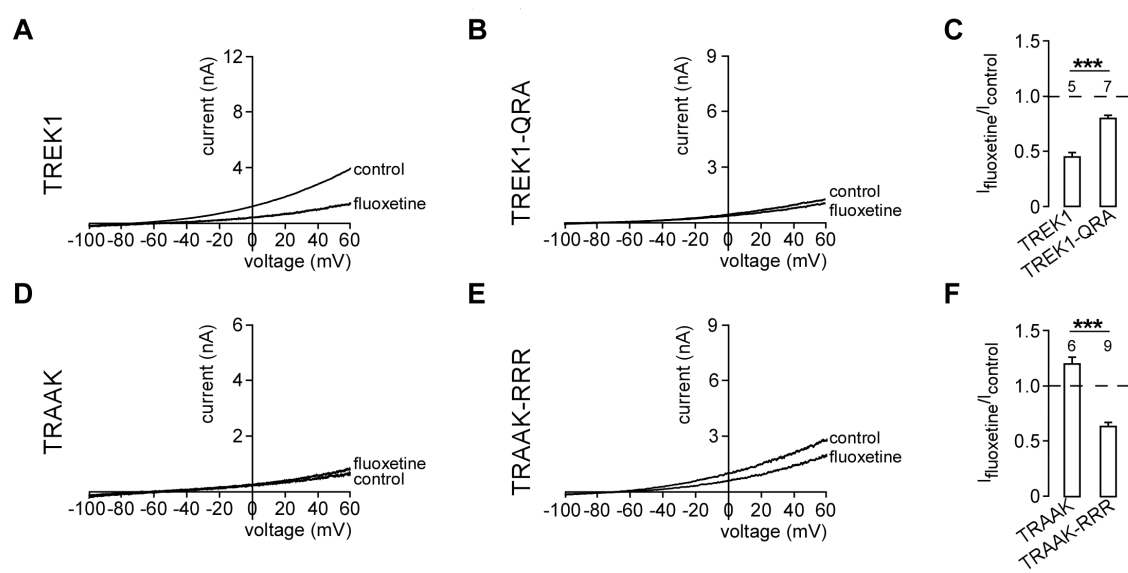

FIGURE S5. **A, B, D, E**, Representative patch-clamp recordings from HEK cells expressing wild-type (**A, D**) or mutant channels (**B, E**) in the presence of 10  $\mu$ M fluoxetine on basal currents. **C, F**, Fraction of fluoxetine-sensitive current. Data are presented as mean  $\pm$  SEM. \*\*\* $p$ <0.001, the number of cells is indicated (Student's t-test).
